# Supplementary material for: Screening for hepatitis B, C and D in metropolitan France from 2016 to 2022: A map based on the National Health Data System with a focus on HDV screening
Source: Research Square preprint supplement (doi:10.21203/rs.3.rs-5662958/v1), 2025-04-28
Supplement: Supplementary file 1 [file 7e33e233e3c2864960ee7e99.docx]

Additional Data 1: list and codes of SNDS variables

| Variable of interest | SNDS code: variable and value |
| --- | --- |
| CMUc1beneficiaries | **BEN_CTA_TYP 89 or BEN_CMU_ORG= C** |
| **ACS2** beneficiaries | **BEN_CTA_TYP = 91/ 92/ 93 or BEN_CMU_ORG= S** |
| **C2S (CSS)3** beneficiaries | ***BEN_CTA_TYP* 89 or** **BEN_C2S_TYP = G89 ou P89** |
| **AME4** beneficiaries | **BEN_CMU_CAT = 5 or BEN_CMU_ORG=A** |
| Provisional NIR5 beneficiaries | **BEN_CDI_NIR = 03 or 04** |
| Prison status | **RGM_COD 651 to 659** |
| **ALD6** | **VHB : CIM_COD =B16/B161/B169/B180/B181** |
| **VIH : ALD_030_COD=7** |
| Opioid substitution treatments | **PHA_ATC_CLA =** involving **« N07BC »** |
| Antidepressant treatments | **PHA_ATC_CLA =** involving **« N06A »** |
| **HBV treatments 7** | **Tenofovir disoproxyl : PHA_ATC_CLA = J05AF07** |
| **Entecavir PHA_ATC_CLA = J05AF10** |
| **Tenofovir alafenamide : PHA_ATC_CLA = J05AF13**  **Lamivudine : PHA_ATC_CLA = J05AF05** |
| **HDV treatments** | **Bulevirtide** : PHA_ATC_CLA = J05AX28 ou UCD_UCD_COD = 0000009000525** |
| **PEG-interféron alpha 2a : PHA_ATC_CLA = L03AB11** |

*From November 1, 2020; **excluding 2019 AAC - nominative and cohort ATU (transitional authorization of use).

1 Universal complementary health cover

2 Assistance with the payment of a complementary health insurance

3 Solidarity complementary health insurance

4 State medical aid

5 Beneficiaries of a provisional NIR (Social security registration number)

6 Long-term illness

7 Nucleos(t)ide analogues (NUC)

The profiles of the prescribers (specialties, statuses and affiliation structures) for the three tests were described from the ER_PRS_F table of the DCIR (PSP_STJ_COD; PSP_SPE_COD) and the T_MCO_AAFL and T_MCO AAFLSTC tables of the PMSI.
